# Supplementary material for: A systematic review exploring the association between the human gut microbiota and brain connectivity in health and disease
Source: bioRxiv or medRxiv preprint supplement (doi:10.1101/2022.11.29.22282879), 2022-11-30
Supplement: Supplementary file [file media-4.pdf]

**The quality assessment of the microbiome measurement per study, using the STORMS (v1.03) criteria**

[illegible]
