# Supplementary material for: A systematic review exploring the association between the human gut microbiota and brain connectivity in health and disease
Source: bioRxiv or medRxiv preprint supplement (doi:10.1101/2022.11.29.22282879), 2022-11-30
Supplement: Supplementary file [file media-6.pdf]

The quality assessment, quality rating and explanatory notes for each study, based on the criteria presented in table S3-5

| Author (year)                                | Q1  | Q2 | Q3  | Q4  | Q5 | Q6  | Q7 | Q8 | Q9  | Q10 | Q11 | Q12 | Q13 | Q14 | Q15 | Q16 | Quality rating | Notes                                                                                                                                                                                                                                                                                                                                                                                                                                                                                                                                                                                                                                      |
|----------------------------------------------|-----|----|-----|-----|----|-----|----|----|-----|-----|-----|-----|-----|-----|-----|-----|----------------|--------------------------------------------------------------------------------------------------------------------------------------------------------------------------------------------------------------------------------------------------------------------------------------------------------------------------------------------------------------------------------------------------------------------------------------------------------------------------------------------------------------------------------------------------------------------------------------------------------------------------------------------|
| Curtis (2019)                                | yes | no | yes | no  | NA | no  | no | no | yes | no  | no  | no  | NA  | NA  | no  | no  | 27% Poor       | 2. Unclear where and in what time period participants were recruited<br>4. Inclusion/exclusion criteria not consistent across groups and no inclusion criteria provided for the control participants<br>6. No sample size justification or reporting of effect size estimates<br>10. Lack of clarity regarding laboratory site, shipping, storage and sequencing methods<br>11. The gut microbiota was measured only once<br>12. Lack of detail regarding MRI acquisition<br>15. Analyses were only corrected for smoking status<br>16. Unclear which statistical tests were performed, and direction of effects not consistently reported |
| Cai (2021) /<br>Zhu (2022) /<br>Zhang (2022) | yes | no | yes | yes | NA | no  | no | no | yes | no  | no  | yes | NA  | NA  | yes | yes | 64% Fair       | 2. Unclear where and in what time period participants were recruited<br>6. No sample size justification or reporting of effect size estimates<br>10. Lack of clarity regarding sequencing methods<br>11. The gut microbiota was measured only once                                                                                                                                                                                                                                                                                                                                                                                         |
| Hall (2021)                                  | yes | no | yes | yes | NA | yes | no | no | yes | no  | no  | yes | NA  | NA  | yes | no  | 64% Fair       | 2. No time-period for recruitment reported<br>10. The used primer is not reported<br>11. The gut microbiota was measured only once<br>16. No correction for multiple testing                                                                                                                                                                                                                                                                                                                                                                                                                                                               |
| Kohn (2021)                                  | yes | no | yes | yes | NA | no  | no | no | yes | yes | no  | yes | NA  | NA  | no  | yes | 64% Fair       | 2. Unclear where and in what time period participants were recruited<br>6. No sample size justification or reporting of effect size estimates<br>11. The gut microbiota was measured only once<br>15. The analyses were not corrected for age and sex, but the sample included only females in a narrow age-range                                                                                                                                                                                                                                                                                                                          |
| Tillisch (2017)                              | yes | no | yes | yes | NA | no  | no | no | yes | yes | no  | yes | NA  | NA  | yes | no  | 64% Fair       | 2. Unclear where participants were recruited<br>6. No sample size justification or reporting of effect size estimates<br>11. The gut microbiota was measured only once<br>16. Methodological decisions not well described in the context of the sample size                                                                                                                                                                                                                                                                                                                                                                                |
| Gao (2019)                                   | yes | no | no  | yes | NA | no  | no | no | yes | no  | no  | no  | NA  | NA  | yes | yes | 45% Poor       | 2. No time-period for recruitment reported<br>3. The rs-fMRI scan was not successful for over 50% of the eligible infants<br>6. No sample size justification or reporting of effect size estimates<br>10. Lack of clarity regarding sequencing methods<br>11. The gut microbiota was measured only once<br>12. Lack of detail regarding MRI acquisition                                                                                                                                                                                                                                                                                    |
| Kelsey (2021)                                | yes | no | yes | yes | NA | yes | no | no | yes | yes | no  | yes | NA  | NA  | yes | yes | 82% Good       | 2. No time-period for recruitment reported<br>11. The gut microbiota was measured only once                                                                                                                                                                                                                                                                                                                                                                                                                                                                                                                                                |

| Author (year)              | Q1  | Q2  | Q3  | Q4  | Q5  | Q6 | Q7  | Q8  | Q9  | Q10 | Q11 | Q12 | Q13 | Q14 | Q15 | Q16 | Quality rating | Notes                                                                                                                                                                                                                                                                                                                                                                                                                                                                                                                                                                                                                                                             |
|----------------------------|-----|-----|-----|-----|-----|----|-----|-----|-----|-----|-----|-----|-----|-----|-----|-----|----------------|-------------------------------------------------------------------------------------------------------------------------------------------------------------------------------------------------------------------------------------------------------------------------------------------------------------------------------------------------------------------------------------------------------------------------------------------------------------------------------------------------------------------------------------------------------------------------------------------------------------------------------------------------------------------|
| Wang (2019) / Zheng (2020) | yes | no  | yes | no  | NR  | no | no  | no  | yes | no  | no  | yes | no  | NA  | yes | no  | 42%<br>Poor    | 2. No time-period for recruitment reported<br>4. Unclear whether the inclusion/exclusion criteria are consistently applied across cases and controls. There are inconsistencies in the description of the inclusion/exclusion criteria across the two reports (based on the same sample)<br>6. No sample size justification or reporting of effect size estimates<br>10. Lack of clarity regarding laboratory site, shipping and sequencing methods<br>11. The gut microbiota was measured only once<br>13. The analyses were not performed blinded to the case/control status of the participants<br>16. Unclear which tests were corrected for multiple testing |
| Dong (2022)                | yes | no  | yes | yes | yes | no | no  | no  | yes | no  | no  | yes | no  | NA  | no  | yes | 58%<br>Fair    | 2. Unclear where and in what time period participants were recruited<br>6. No sample size justification or reporting of effect size estimates<br>10. Lack of clarity regarding laboratory site, sample collection and shipping<br>11. The gut microbiota was measured only once<br>13. The analyses were not performed blinded to the case/control status of the participants<br>15. The analyses were not corrected for age and sex                                                                                                                                                                                                                              |
| Dong (2020)                | yes | no  | yes | yes | NA  | no | yes | yes | yes | no  | no  | yes | NA  | yes | no  | no  | 57%<br>Fair    | 2. No time-period for recruitment reported<br>6. No sample size justification or reporting of effect size estimates<br>10. Lack of clarity regarding laboratory site, sample collection, shipping, storage and primers used<br>11. The gut microbiota was measured only once before and after the intervention<br>15. The analyses were not corrected for age and sex<br>16. Lack of clarity regarding methodological decisions. E.g., it is not explained why data from different timepoint was pooled                                                                                                                                                           |
| Strandwitz (2019)          | yes | no  | yes | yes | NA  | no | no  | no  | yes | yes | no  | no  | NA  | NA  | yes | yes | 64%<br>Fair    | 2. No time-period for recruitment reported<br>6. No sample size justification or reporting of effect size estimates<br>11. The gut microbiota was measured only once<br>12. Lack of detail regarding MRI acquisition                                                                                                                                                                                                                                                                                                                                                                                                                                              |
| Ahluwalia (2016)           | yes | no  | yes | yes | NA  | no | no  | no  | yes | no  | no  | no  | NA  | NA  | no  | no  | 36%<br>Poor    | 2. No time-period for recruitment reported<br>6. No sample size justification or reporting of effect size estimates<br>10. Lack of clarity regarding laboratory site, sample collection, shipping, storage and sequencing method<br>11. The gut microbiota was measured only once<br>12. MRI pre-processing steps not reported<br>15. The analyses were not corrected for age and sex<br>16. Lack of clarity regarding statistical approach                                                                                                                                                                                                                       |
| Labus (2019)               | yes | yes | yes | yes | NR  | no | no  | no  | yes | no  | no  | yes | no  | NA  | yes | no  | 58%<br>Fair    | 6. No sample size justification or reporting of effect size estimates<br>10. Lack of clarity regarding sample storage and sequencing method<br>11. The gut microbiota was measured only once<br>13. The analyses were not performed blinded to the case/control status of the participants<br>16. No correction for multiple testing                                                                                                                                                                                                                                                                                                                              |

| Author (year) | Q1  | Q2  | Q3  | Q4  | Q5 | Q6  | Q7  | Q8  | Q9  | Q10 | Q11 | Q12 | Q13 | Q14 | Q15 | Q16 | Quality rating | Notes                                                                                                                                                                                                                                                                                |
|---------------|-----|-----|-----|-----|----|-----|-----|-----|-----|-----|-----|-----|-----|-----|-----|-----|----------------|--------------------------------------------------------------------------------------------------------------------------------------------------------------------------------------------------------------------------------------------------------------------------------------|
| Li (2022)     | yes | no  | yes | yes | NR | yes | no  | no  | yes | no  | no  | yes | no  | NA  | no  | no  | 50% Fair       | 2. No time-period for recruitment reported<br>10. Lack of clarity regarding pre-processing steps<br>15. The analyses were not corrected for age and sex<br>16. Lack of clarity regarding which statistical tests were used and which variables were used for functional connectivity |
| Hong (2021)   | yes | yes | yes | yes | NA | no  | yes | yes | yes | yes | no  | yes | NA  | no  | yes | yes | 79% Good       | 6. No sample size justification or reporting of effect size estimates<br>11. The gut microbiota was measured only once before and after the intervention<br>14. Loss to follow-up was more than 20%                                                                                  |
| Jacobs (2021) | yes | yes | yes | yes | NA | no  | yes | yes | yes | yes | no  | yes | no  | yes | yes | yes | 80% Good       | 6. No sample size justification or reporting of effect size estimates<br>11. The gut microbiota was measured only once before and after the intervention<br>13. The analyses were not performed blinded to the response status of the participants                                   |

NA: not applicable; NR: not reported

|               |   |
|---------------|---|
| Poor (<50%)   | 4 |
| Fair (50-74%) | 9 |
| Good (≥75%)   | 3 |
